# Supplementary material for: Intensive and thermally conductive boron nitride/aramid nanofiber composite fibers fabricated via a wet spinning technique
Source: Royal Society of Chemistry journal article supplement (doi:10.1039/d3tc02746e), 2023-01-01
Supplement: d3tc02746e1.pdf [file d3tc02746e1.pdf]

## **Intensive and Thermal Conductive Boron Nitride/Aramid Nanofiber Composite Fiber Fabricated *via* Wet Spinning Technique**

Derui Kong,<sup>a,b</sup> Jizhen Zhang,<sup>\*b</sup> Zihao Hou,<sup>a,b</sup> Xu Zhao,<sup>c</sup> Ting Ren,<sup>c</sup> Chuang Liu,<sup>c</sup> Jinlong Tao,<sup>b,d</sup> Na Kong<sup>b</sup> and Yumei Gong<sup>\*a</sup>

<sup>a</sup> School of Textile and Material Engineering, Dalian Polytechnic University, Dalian, 116034, China

<sup>b</sup> Hainan Province International Joint Research Center of Advanced Tropical Crop Materials, Agricultural Products Processing Research Institute, Chinese Academy of Tropical Agricultural Sciences, Zhanjiang, 524001, China

<sup>c</sup> College of Chemistry and Chemical Engineering, Mudanjiang Normal University, Mudanjiang, 157011, China

<sup>d</sup> Hainan Provincial Key Laboratory of Natural Rubber Processing, Zhanjiang, 524001, China

\*Corresponding author.

E-mail address: jizhen0510@outlook.com (J. Zhang), ymgong@dlpu.edu.cn (Y. Gong).

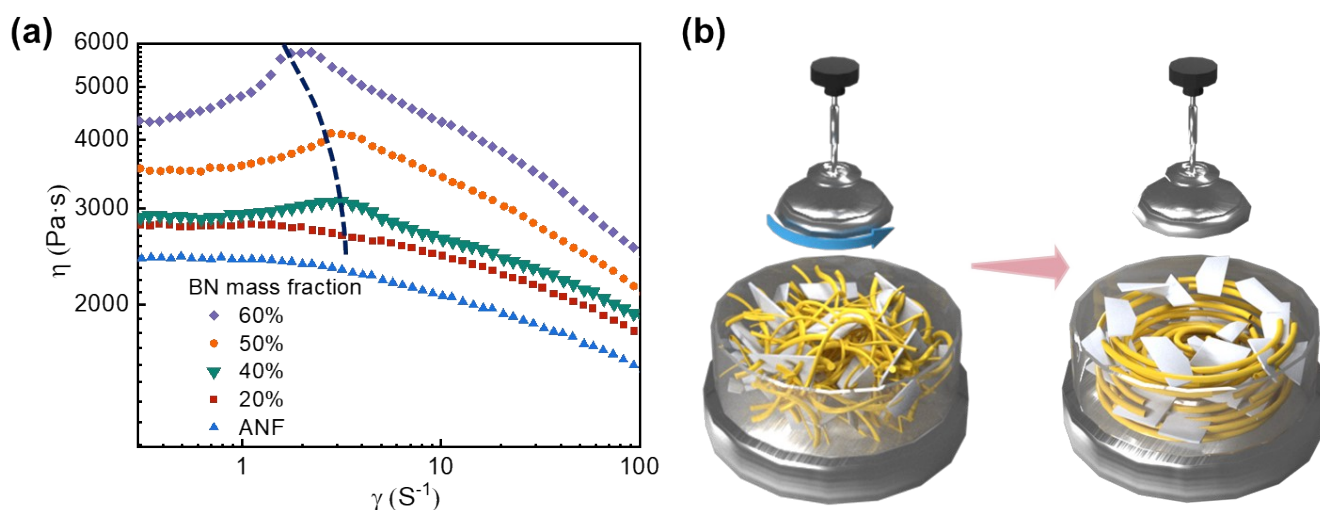

**Fig. S1.** (a) Shear-viscosity curves of pure ANF dispersions and BN/ANF dispersions with different BN mass fractions. (b) Schematic representation of the arrangement of ANF and BN nanosheets within the dispersion under shearing force.

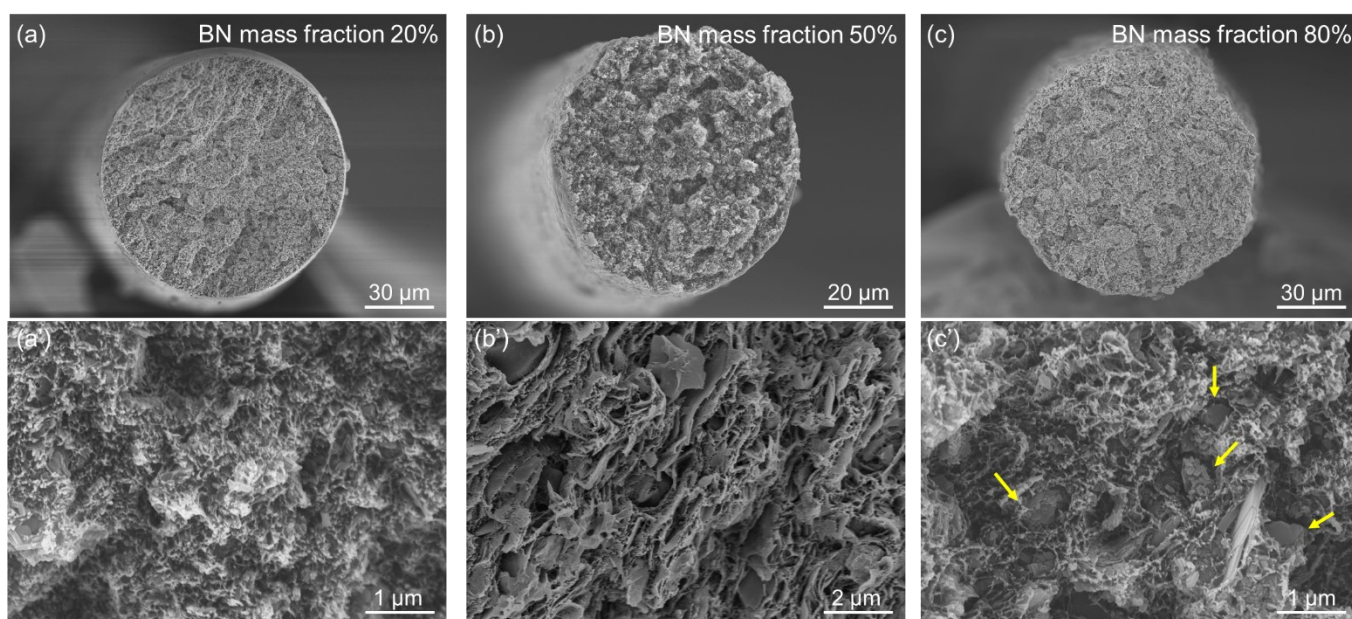

**Fig. S2.** The cross-sectional (Top) and the corresponding magnified (below) SEM images of the BN/ANF composite fibers.

The cross-sectional SEM images of composite fibers with different BN contents are illustrated in Fig. S2. When the BN content reaches 80 wt%, BN sheets are aggregated and the ANF content is too low to effectively encapsulate BN and provide mechanical support, as marked by yellow arrows in image c'.

Consequently, there is a significant presence of undispersed BN nanosheet clusters within the fibers, severely impacting the mechanical performance of the fibers. On the other hand, as the BN content is only 20 wt%, it is too low to observe the formation of effective thermal transfer pathways composed of BN nanosheets. In contrast, at a BN content of 40 ~ 60 wt%, BN is uniformly dispersed within the fibers, and observed physical contact between nanosheets, form efficient phonon transfer channels.

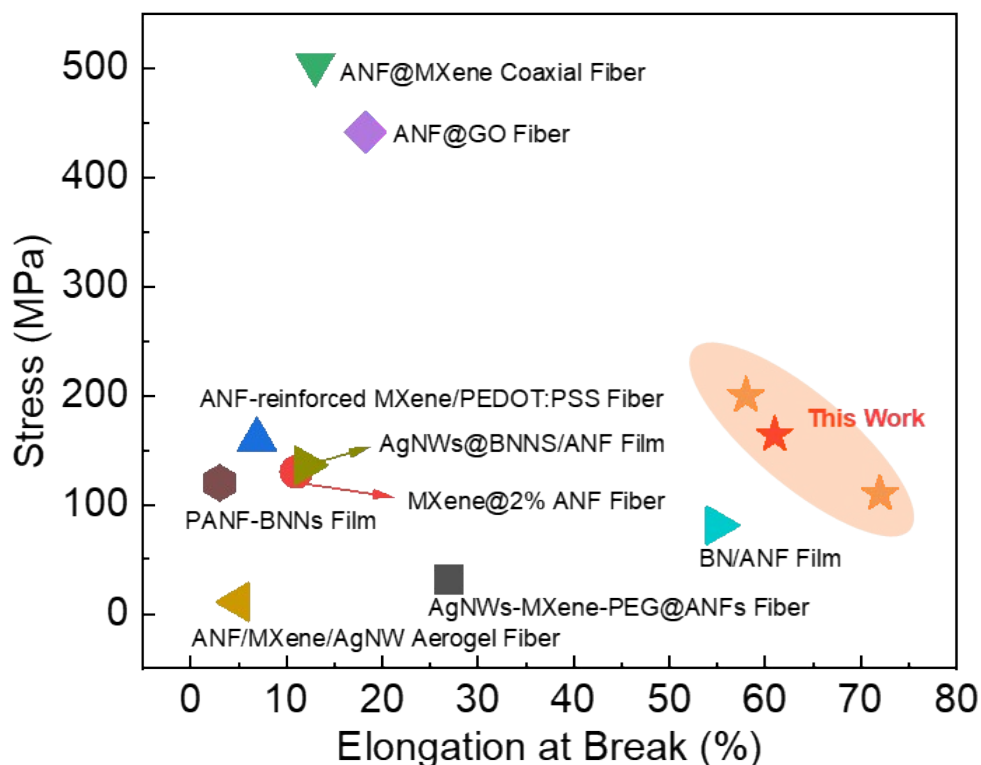

**Fig. S3** Comparison of mechanical properties: BN/ANF composite fibers compared with prior ANF-based composites and BN/ANF films. (Materials for comparison can be found in the References No. 4, 5, 26-28, 35, 39, 40, 47 in the manuscript.)

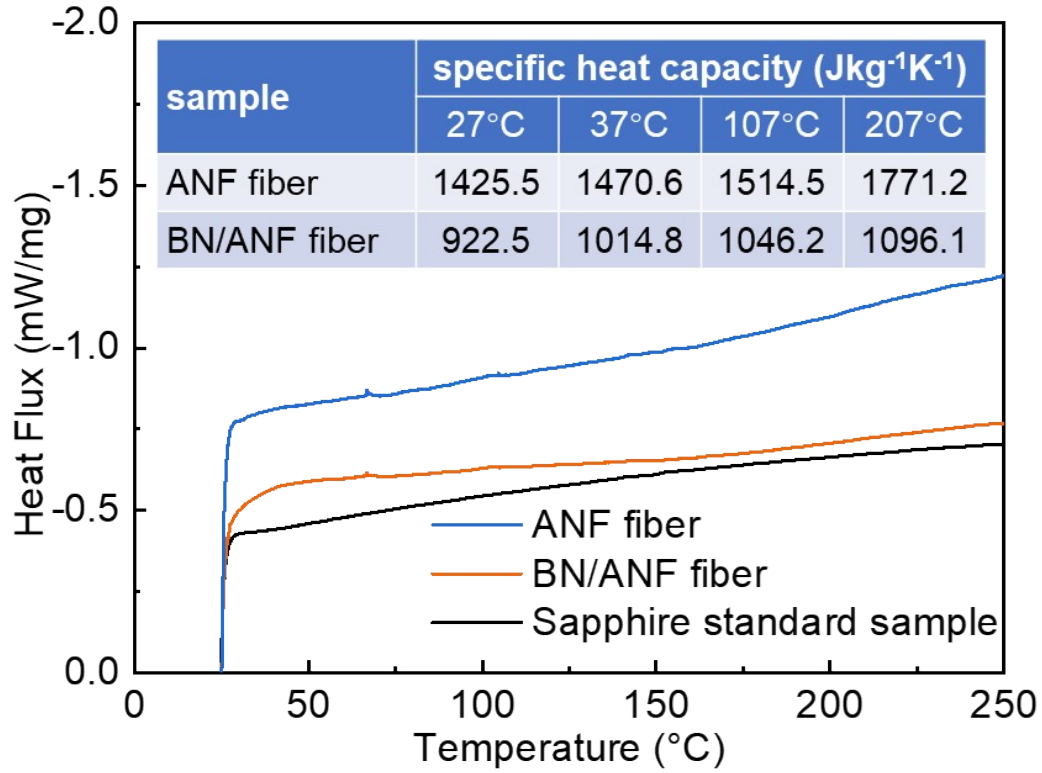

**Fig. S4.** The DSC curves of ANF fibers and BN/ANF fibers, along with their specific heat capacities at various temperatures.

The specific heat capacity of the fibers is measured by DSC sapphire method. Three-step test method is adopted to minimize the interference caused by the instrument and the test process. At the same time, because the sapphire standard is pure single crystal alumina, the physical and chemical properties are very stable, which can improve the accuracy of the specific heat capacity of the DSC test substance.

At the same heating rate, the DSC spectra of the blank crucible was first tested as the baseline, then the sapphire standard was tested, and finally the test sample was tested.

The calculation adopted the equation S1,

$$C_p^F = C_p^S \left( \frac{m_S}{m_F} \right) \left[ \frac{P_F - P_E}{P_S - P_E} \right] \quad (S1)$$

Where,  $C_p^F$  and  $C_p^S$  are the specific heat capacity of the sample and the sapphire standard sample ( $J\ kg^{-1}K^{-1}$ ),  $m_F$  and  $m_S$  are the mass of the sample and the sapphire standard (kg),  $P_F$ ,  $P_S$ ,  $P_E$  are the heat flow of the sample, sapphire standard, and empty crucible.

The results show that the specific heat capacity of the composite fiber decreased significantly after adding BN nanosheets. It indicates that BN/ANF fabrics have higher thermal responsiveness to external temperature changes.

We calculate its value by measuring the image dimensions of the BN/ANF composite fibers and the mass using a microbalance. When the BN mass fraction is 50%, the composite fiber density is approximately  $1.45\ g/cm^3$ .

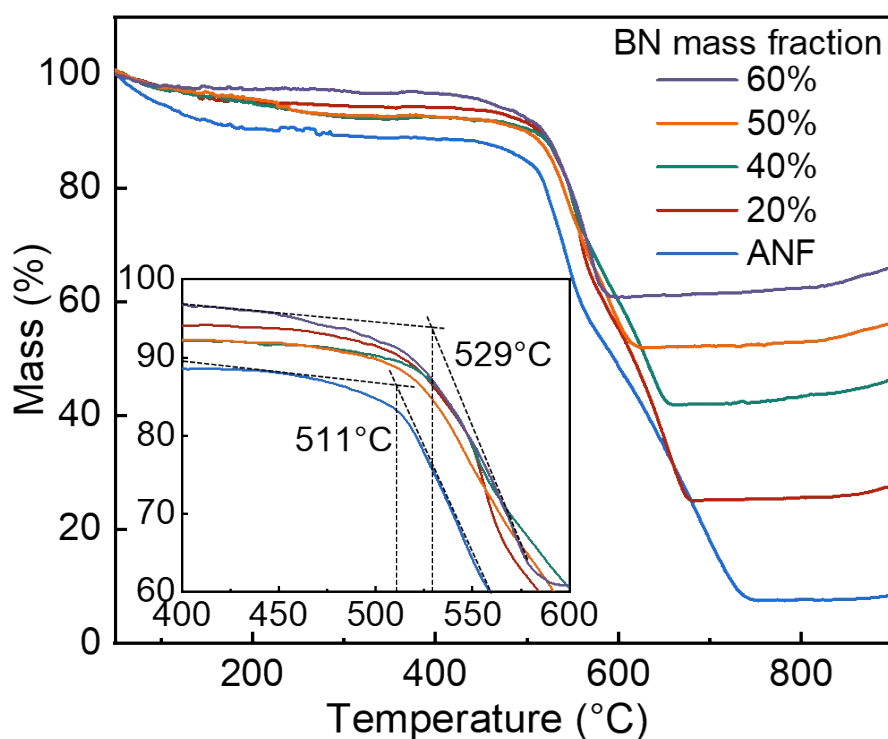

**Fig. S5.** Thermogravimetric curves of pure ANF fibers and BN/ANF fibers with different BN mass fractions.
